# Supplementary material
Source: ML conference proceedings conference paper supplement (https://openaccess.thecvf.com/content/ICCV_2019/html/Cho_On_the_Efficacy_ICCV_2019_paper.html)
Supplement: Supplementary file 1 [file Cho_On_the_Efficacy_ICCV_2019_supplemental.pdf]

# On the Efficacy of Knowledge Distillation - Supplementary Materials

Jang Hyun Cho  
Cornell University  
jc2926@cornell.edu

Bharath Hariharan  
Cornell University  
bh497@cornell.edu

| Student: WRN16-1 |          |        |                   |                      |
|------------------|----------|--------|-------------------|----------------------|
| Teacher          | # params | Mode   | Teacher Error (%) | Student Error (%)    |
| -                | -        | 60/200 | -                 | 8.751 ± 0.129        |
| DN40-24          | 0.69 M   | 60/200 | 5.419             | 8.350 ± 0.195        |
| DN100-12         | 0.77 M   |        | 4.974             | 8.297 ± 0.069        |
| DN40-48          | 2.73 M   |        | 4.667             | 8.370 ± 0.212        |
| DN100-24         | 3.02 M   |        | 4.272             | 8.763 ± 0.178        |
| DN40-24          | 0.69 M   | 15/50  | 6.823             | 8.045 ± 0.092        |
| DN100-12         | 0.77 M   |        | 6.615             | 7.915 ± 0.120        |
| DN40-48          | 2.73 M   |        | 5.666             | <b>7.854 ± 0.127</b> |
| DN100-24         | 3.02 M   |        | 5.435             | 8.016 ± 0.223        |

Table 1. WideResNet16-1 trained with different DenseNet teachers. First number next to “DN” indicates depth, followed by growth factor (consistent with the original paper). Top-row shows the result of WideResNet16-1 trained from scratch. In all cases, student trained with early-stopped DenseNet teacher performs better by large margin.

## 1. More Results on CIFAR10

Here we report more results and details of experiments in our work. Consistent with the main paper, “WRN” and “DN” stand for WideResNet and DenseNet, respectively. Table 7 and 8 show the efficacy of early-stopped teachers for student network WideResNet16-1 and WideResNet28-1 trained from teachers with varying width factor. As stated in the main paper, the number of total epochs  $N \in \{35, 50, 65, 80, 200\}$  and learning rate decay step size  $k \in \{10, 15, 20, 25, 60\}$  were considered in this experiment. Table 9 shows that our conclusions are consistent with different knowledge distillation method such as attention transfer (“AT+KD”). Table 1, 2, 3, and 6 show different experiment settings (different student-teacher pairs, learning method, etc.)

## 2. Details on ImageNet Experiments

Here we report more details of ImageNet experiments. Figure 1 are comparisons of different student accuracy plots, showing the harming effect of distillation. Table 4 shows the fully-trained and early-stopped models used as a teacher for ImageNet experiments.

| Student: DN40-12 |          |        |                   |                      |
|------------------|----------|--------|-------------------|----------------------|
| Teacher          | # params | Mode   | Teacher Error (%) | Student Error (%)    |
| -                | -        | 60/200 | -                 | 7.268 ± 0.148        |
| DN40-12          | 0.18 M   | 60/200 | 7.169             | 6.821 ± 0.226        |
| DN40-24          | 0.69 M   | 60/200 | 5.419             | 6.964 ± 0.139        |
| DN100-12         | 0.77 M   |        | 4.974             | 6.847 ± 0.278        |
| DN40-48          | 2.73 M   |        | 4.667             | 7.266 ± 0.359 *      |
| DN100-24         | 3.02 M   |        | 4.272             | 7.507 ± 0.204 *      |
| DN40-24          | 0.69 M   | 15/50  | 6.823             | 6.981 ± 0.112        |
| DN100-12         | 0.77 M   |        | 6.615             | <b>6.645 ± 0.089</b> |
| DN40-48          | 2.73 M   |        | 5.666             | 6.679 ± 0.123        |
| DN100-24         | 3.02 M   |        | 5.435             | 6.721 ± 0.298        |

Table 2. DenseNet40-12 trained with different DenseNet teachers. First number next to “DN” indicates depth, followed by growth factor (consistent with the original paper). Top-row shows the result of DenseNet40-12 trained from scratch. In all cases student trained with early-stopped DenseNet teacher performs better by large margin. Numbers with \* indicate that the students failed to achieve the same accuracy of student trained from scratch.

| Student | Teacher          | Schedule Type | Error (%)            |
|---------|------------------|---------------|----------------------|
| WRN16-1 | WRN16-8          | Cosine        | 7.945 ± 0.127        |
|         | WRN16-8 (20/65)  | Cosine        | <b>7.781 ± 0.201</b> |
|         | WRN100-1         | Cosine        | 8.524 ± 0.182        |
|         | WRN100-1 (20/65) | Cosine        | <b>8.191 ± 0.104</b> |

Table 3. CIFAR10 results of knowledge distillation with a different learning rate decaying schedule, “Cosine” scheduling. Student trained with early-stopped teacher performed better.

| Model          | # params | Top 1 Error (%) | Top 5 Error (%) |
|----------------|----------|-----------------|-----------------|
| ResNet18       | 11.69 M  | 30.24           | 10.92           |
| ResNet34       | 21.79 M  | 26.70           | 8.58            |
| ResNet34 (50)  | 21.79 M  | 27.72           | 9.10            |
| ResNet50       | 25.56 M  | 23.85           | 7.13            |
| ResNet50 (35)  | 25.56 M  | 27.01           | 8.75            |
| ResNet152      | 60.19 M  | 21.69           | 6.03            |
| ResNet152 (35) | 60.19 M  | 23.58           | 7.03            |

Table 4. Details of models trained from scratch that are used as teachers for ImageNet experiments in the main paper. Models with a number inside parentheses are early-stopped.

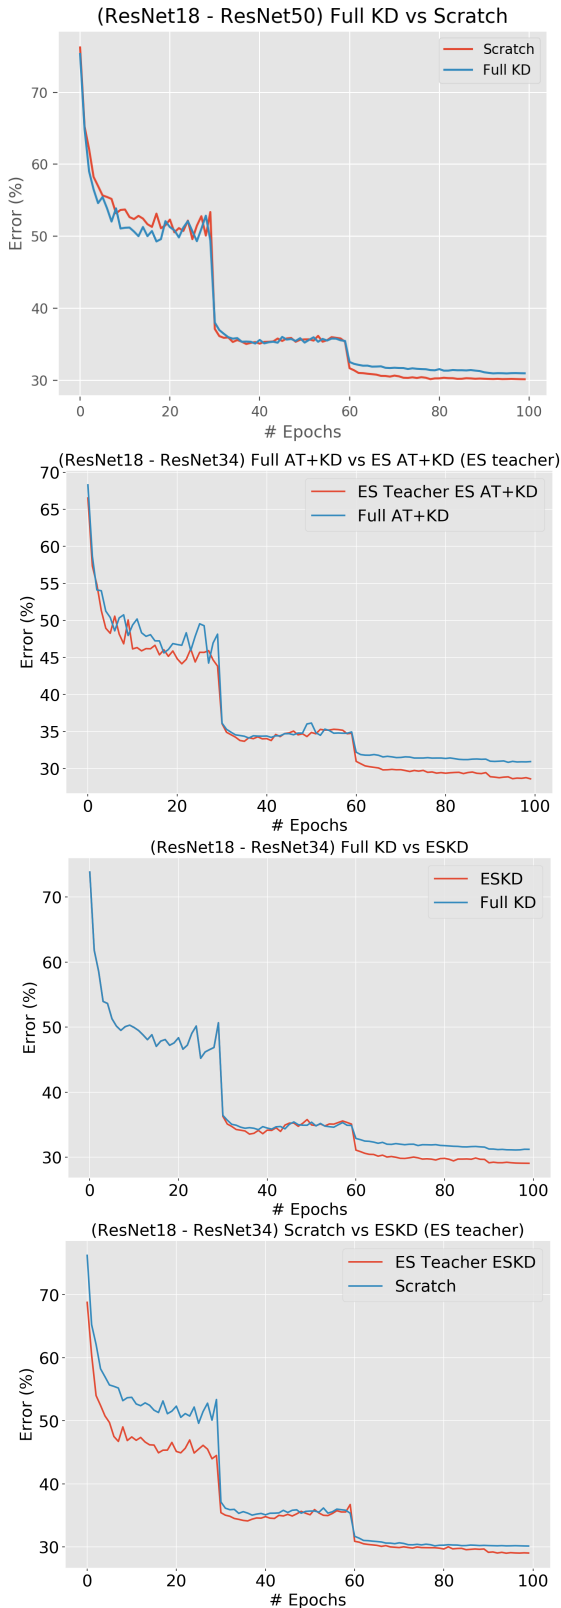

Figure 1. Different plots showing the harming effect of knowledge distillation when student capacity is limited, and how early-stopping mitigates the effect.

| Student: WRN16-1 |          |        |                   |                      |
|------------------|----------|--------|-------------------|----------------------|
| Teacher          | # params | Mode   | Teacher Error (%) | Student Error (%)    |
| -                | -        | 60/200 | -                 | 8.751 ± 0.129        |
| WRN40-1          | 0.56M    | 60/200 | 6.517             | 8.324 ± 0.111        |
| WRN52-1          | 0.76 M   |        | 6.042             | 8.481 ± 0.198        |
| WRN64-1          | 0.95 M   |        | 6.032             | 8.573 ± 0.158        |
| WRN76-1          | 1.15 M   |        | 5.864             | 8.666 ± 0.121        |
| WRN88-1          | 1.34 M   |        | 5.686             | 8.811 ± 0.153        |
| WRN100-1         | 1.54 M   |        | 5.568             | 8.484 ± 0.182        |
| WRN154-1         | 2.41 M   |        | 5.478             | 8.546 ± 0.181        |
| WRN250-1         | 3.97 M   |        | 5.271             | 8.787 ± 0.173        |
| WRN100-1         | 1.54 M   |        | 7.526             | <b>8.192 ± 0.198</b> |
| WRN154-1         | 2.41 M   | 15/50  | 7.318             | 8.227 ± 0.212        |
| WRN250-1         | 3.97 M   |        | 6.893             | 8.263 ± 0.234        |

Table 5. WideResNet16-1 trained with teachers varying depth factor. All students trained with early-stopped teacher performed better than any of students trained from fully-trained teacher by large margin. Among ones with fully-trained teachers, larger models did not make better student. All results are consistent with our conclusions. Note that WideResNet with width factor 1 is equivalent to Pre-Activated ResNet.

| Student: DN40-12 |          |        |                   |                      |
|------------------|----------|--------|-------------------|----------------------|
| Teacher          | # params | Mode   | Teacher Error (%) | Student Error (%)    |
| -                | -        | 60/200 | -                 | 7.268 ± 0.148        |
| WRN40-1          | 0.56M    | 60/200 | 6.517             | 7.389 ± 0.244        |
| WRN52-1          | 0.76 M   |        | 6.042             | 7.640 ± 0.204        |
| WRN64-1          | 0.95 M   |        | 6.032             | 7.600 ± 0.247        |
| WRN76-1          | 1.15 M   |        | 5.864             | 7.407 ± 0.137        |
| WRN88-1          | 1.34 M   |        | 5.686             | 7.642 ± 0.131        |
| WRN100-1         | 1.54 M   |        | 5.568             | 7.693 ± 0.134        |
| WRN154-1         | 2.41 M   |        | 5.478             | 7.780 ± 0.299        |
| WRN250-1         | 3.97 M   |        | 5.271             | 7.711 ± 0.152        |
| WRN100-1         | 1.54 M   |        | 7.526             | <b>7.025 ± 0.182</b> |
| WRN154-1         | 2.41 M   | 15/50  | 7.318             | 7.169 ± 0.161        |
| WRN250-1         | 3.97 M   |        | 6.893             | 7.488 ± 0.291        |

Table 6. DenseNet40-12 trained with WideResNet teachers varying depth factor. All students trained with early-stopped teacher performed better than any of students trained from fully-trained teacher by large margin. Among ones with fully-trained teachers, larger models did not make better student. All results are consistent with our conclusions. Note that WideResNet with width factor 1 is equivalent to Pre-Activated ResNet.

| Student: WRN16-1 |          |        |                   |                      |
|------------------|----------|--------|-------------------|----------------------|
| Teacher          | # params | Mode   | Teacher Error (%) | Student Error (%)    |
| WRN16-1          | 0.17M    | 60/200 | 8.751             | 8.182 ± 0.250        |
| WRN16-2          | 0.69M    | 60/200 | 6.269             | 7.610 ± 0.222        |
| WRN16-3          | 1.55M    | 60/200 | 5.340             | 7.681 ± 0.259        |
|                  |          | 25/80  | 6.289             | 7.517 ± 0.212        |
|                  |          | 20/65  | 6.507             | <b>7.498 ± 0.201</b> |
|                  |          | 15/50  | 6.734             | 7.788 ± 0.112        |
|                  |          | 10/35  | 7.416             | 8.093 ± 0.119        |
| WRN16-4          | 2.74M    | 60/200 | 4.964             | 7.733 ± 0.186        |
|                  |          | 25/80  | 5.666             | 7.658 ± 0.062        |
|                  |          | 20/65  | 5.963             | <b>7.612 ± 0.112</b> |
|                  |          | 15/50  | 6.358             | 7.788 ± 0.112        |
|                  |          | 10/35  | 7.130             | 8.093 ± 0.119        |
| WRN16-6          | 6.17M    | 60/200 | 4.529             | 7.929 ± 0.071        |
|                  |          | 25/80  | 5.261             | 7.687 ± 0.157        |
|                  |          | 20/65  | 5.498             | <b>7.594 ± 0.173</b> |
|                  |          | 15/50  | 5.893             | 7.685 ± 0.163        |
|                  |          | 10/35  | 6.635             | 7.751 ± 0.157        |
| WRN16-8          | 10.96M   | 60/200 | 4.410             | 8.028 ± 0.136        |
|                  |          | 25/80  | 4.984             | 7.642 ± 0.163        |
|                  |          | 20/65  | 5.270             | <b>7.482 ± 0.041</b> |
|                  |          | 15/50  | 5.498             | 7.596 ± 0.089        |
|                  |          | 10/35  | 6.240             | 7.784 ± 0.223        |

Table 7. WideResNet16-1 trained with different teachers, and each teacher we performed different “shrinking” of the learning schedule. Step size  $k \in \{10, 15, 20, 25, 60\}$  and total number of epoch  $N \in \{35, 50, 65, 80, 200\}$  were considered. For kinds of teacher network, students trained with any of the early-stopped teachers outperforms the model trained with fully-trained teacher.

| Student: WRN28-1 |          |        |                   |                      |
|------------------|----------|--------|-------------------|----------------------|
| Teacher          | # params | Mode   | Teacher Error (%) | Student Error (%)    |
| WRN28-1          | 0.36M    | 60/200 | 7.101             | 7.101 ± 0.072        |
| WRN28-2          | 1.46M    | 60/200 | 5.201             | 6.973 ± 0.130        |
| WRN28-3          | 3.29M    | 60/200 | 4.687             | 6.952 ± 0.138        |
|                  |          | 25/80  | 5.369             | 6.702 ± 0.159        |
|                  |          | 20/65  | 5.696             | <b>6.621 ± 0.066</b> |
|                  |          | 15/50  | 6.180             | 6.544 ± 0.262        |
|                  |          | 10/35  | 6.962             | 6.807 ± 0.076        |
| WRN28-4          | 5.84M    | 60/200 | 4.509             | 7.118 ± 0.198        |
|                  |          | 25/80  | 4.994             | 6.768 ± 0.099        |
|                  |          | 20/65  | 5.201             | 6.772 ± 0.060        |
|                  |          | 15/50  | 5.824             | <b>6.610 ± 0.330</b> |
|                  |          | 10/35  | 6.526             | 6.718 ± 0.063        |
| WRN28-6          | 13.14M   | 60/200 | 4.104             | 7.070 ± 0.159        |
|                  |          | 25/80  | 4.608             | 6.869 ± 0.152        |
|                  |          | 20/65  | 4.865             | 6.920 ± 0.114        |
|                  |          | 15/50  | 5.330             | 6.720 ± 0.060        |
|                  |          | 10/35  | 5.992             | <b>6.710 ± 0.241</b> |
| WRN28-8          | 23.25M   | 60/200 | 4.064             | 7.227 ± 0.149        |
|                  |          | 25/80  | 4.578             | 6.819 ± 0.155        |
|                  |          | 20/65  | 4.657             | 6.817 ± 0.117        |
|                  |          | 15/50  | 5.092             | <b>6.748 ± 0.118</b> |
|                  |          | 10/35  | 6.022             | 6.795 ± 0.123        |

Table 8. WideResNet28-1 trained with different teachers, and each teacher we performed different “shrinking” of the learning schedule. Step size  $k \in \{10, 15, 20, 25, 60\}$  and total number of epoch  $N \in \{35, 50, 65, 80, 200\}$  were considered. For kinds of teacher network, students trained with any of the early-stopped teachers outperforms the model trained with fully-trained teacher.

| Student         | # params | Error (%) | Teacher         | # params | Teacher Error (%) | Method          | Student Error (%)    |
|-----------------|----------|-----------|-----------------|----------|-------------------|-----------------|----------------------|
| WRN16-1         | 0.17M    | 8.751     | WRN16-1         | 0.17M    | 8.751             | KD              | 8.182 ± 0.250        |
|                 |          |           | WRN16-2         | 0.69M    | 6.269             | KD              | <b>7.610 ± 0.222</b> |
|                 |          |           | WRN16-3         | 1.55M    | 5.340             | KD              | 7.681 ± 0.259        |
|                 |          |           | WRN16-4         | 2.74M    | 4.964             | KD              | 7.733 ± 0.186        |
|                 |          |           | WRN16-6         | 6.17M    | 4.529             | KD              | 7.929 ± 0.071        |
|                 |          |           | WRN16-8         | 10.96M   | 4.410             | KD              | 8.028 ± 0.136        |
| WRN16-1         | 0.17M    | 8.751     | WRN16-2         | 0.69M    | 6.269             | AT+KD           | <b>7.498 ± 0.062</b> |
|                 |          |           | WRN16-3         | 1.55M    | 5.340             | AT+KD           | 7.551 ± 0.130        |
|                 |          |           | WRN16-4         | 2.74M    | 4.964             | AT+KD           | 7.656 ± 0.131        |
|                 |          |           | WRN16-6         | 6.17M    | 4.529             | AT+KD           | 7.668 ± 0.139        |
|                 |          |           | WRN16-8         | 10.96M   | 4.410             | AT+KD           | 7.794 ± 0.203        |
|                 |          |           | WRN16-1         | 0.17M    | 8.751             | WRN16-3 (20/65) | 1.55M                |
| WRN16-4 (20/65) | 2.74M    | 5.963     |                 |          |                   | AT+KD           | 7.585 ± 0.165        |
| WRN16-6 (20/65) | 6.17M    | 5.498     |                 |          |                   | AT+KD           | <b>7.484 ± 0.223</b> |
| WRN16-8 (20/65) | 10.96M   | 5.270     |                 |          |                   | AT+KD           | 7.494 ± 0.165        |
| WRN28-1         | 0.36M    | 7.101     | WRN28-1         | 0.36M    | 7.101             | KD              | 7.101 ± 0.072        |
|                 |          |           | WRN28-2         | 1.46M    | 5.201             | KD              | 6.973 ± 0.130        |
|                 |          |           | WRN28-3         | 3.29M    | 4.687             | KD              | <b>6.952 ± 0.138</b> |
|                 |          |           | WRN28-4         | 5.84M    | 4.509             | KD              | 7.118 ± 0.198        |
|                 |          |           | WRN28-6         | 13.14M   | 4.104             | KD              | 7.070 ± 0.159        |
|                 |          |           | WRN28-8         | 23.35M   | 4.064             | KD              | 7.227 ± 0.149        |
| WRN28-1         | 0.36M    | 7.101     | WRN28-2         | 1.46M    | 5.201             | AT+KD           | 6.538 ± 0.185        |
|                 |          |           | WRN28-3         | 3.29M    | 4.687             | AT+KD           | 6.526 ± 0.121        |
|                 |          |           | WRN28-4         | 5.84M    | 4.509             | AT+KD           | 6.657 ± 0.118        |
|                 |          |           | WRN28-6         | 13.14M   | 4.104             | AT+KD           | <b>6.443 ± 0.092</b> |
|                 |          |           | WRN28-8         | 23.35M   | 4.064             | AT+KD           | 6.487 ± 0.222        |
| WRN28-1         | 0.36M    | 7.101     | WRN28-3 (15/50) | 3.29M    | 6.180             | AT+KD           | 6.410 ± 0.162        |
|                 |          |           | WRN28-4 (15/50) | 5.84M    | 5.824             | AT+KD           | 6.429 ± 0.090        |
|                 |          |           | WRN28-6 (15/50) | 13.14M   | 5.330             | AT+KD           | <b>6.358 ± 0.168</b> |
|                 |          |           | WRN28-8 (15/50) | 23.35M   | 5.092             | AT+KD           | 6.402 ± 0.107        |

Table 9. WideResNet16-1 and WideResNet28-1 trained with teachers of increasing width. Attention transfer method was also explored. Teachers with ( $k/N$ ) indicate early-stopped (step size/ total epochs). Our conclusions are consistent with different method such as attention transfer.

| Student | # params | Error (%) | Teacher          | # params | Teacher Error (%) | Method | Student Error (%)    |
|---------|----------|-----------|------------------|----------|-------------------|--------|----------------------|
| WRN28-1 | 0.36M    | 7.101     | WRN16-4          | 2.74M    | 4.964             | KD     | 6.518 ± 0.204        |
|         |          |           | WRN16-4 (20/65)  |          | 5.963             | KD     | <b>6.483 ± 0.173</b> |
|         |          |           | WRN16-4          |          | 4.964             | AT+KD  | 6.357 ± 0.086        |
|         |          |           | WRN16-4 (20/65)  |          | 5.963             | AT+KD  | <b>6.253 ± 0.177</b> |
| WRN28-1 | 0.36M    | 7.101     | WRN16-6          | 6.17M    | 4.529             | KD     | 6.613 ± 0.227        |
|         |          |           | WRN16-6 (20/65)  |          | 5.498             | KD     | <b>6.230 ± 0.069</b> |
|         |          |           | WRN16-6          |          | 4.529             | AT+KD  | 6.253 ± 0.278        |
|         |          |           | WRN16-6 (20/65)  |          | 5.498             | AT+KD  | <b>6.133 ± 0.113</b> |
| WRN28-1 | 0.36M    | 7.101     | WRN16-11         | 20.70M   | 4.193             | KD     | 6.774 ± 0.111        |
|         |          |           | WRN16-11 (20/65) |          | 5.033             | KD     | <b>6.281 ± 0.184</b> |
|         |          |           | WRN16-11         |          | 4.193             | AT+KD  | 6.360 ± 0.109        |
|         |          |           | WRN16-11 (20/65) |          | 5.033             | AT+KD  | <b>6.202 ± 0.172</b> |

Table 10. WideResNet28-1 student trained with even shallower teachers (WideResNet16-x) on CIFAR10. Consistent with our conclusions, early-stopped teachers produce better student. The teachers are chosen to be compared to WRN28-3, WRN28-4, and WRN28-8 in terms of the number of the parameters.
